# Supplementary material
Source: publisher figshare collection journal article supplement (https://gsapubs.figshare.com/ndownloader/files/22399329)
Supplement: Supplementary file 1 [file 22399329]

Supplemental Figure 2  
Cathodoluminescence images of zircons from U-Pb laser ablation–inductively coupled  
plasma–mass spectrometry analyses

Numbered red points: zircon number and laser spot location; spot size = 40 microns

See Supplemental Table 2 for details

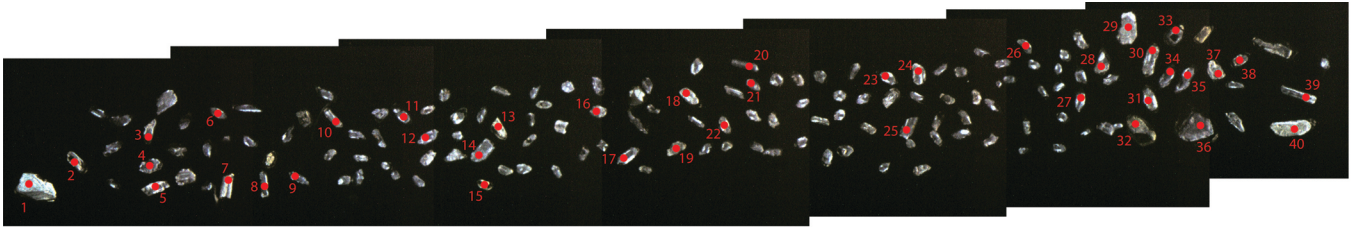

BM100306-1

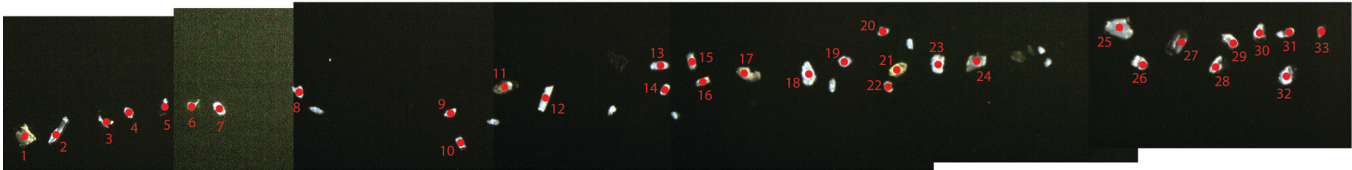

BM100306-3

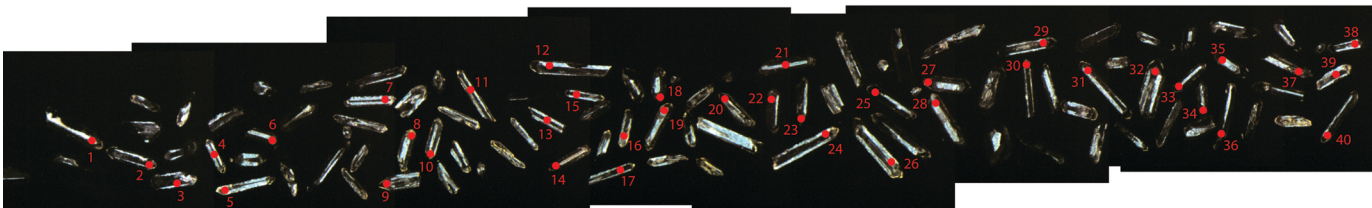

BM100305-4

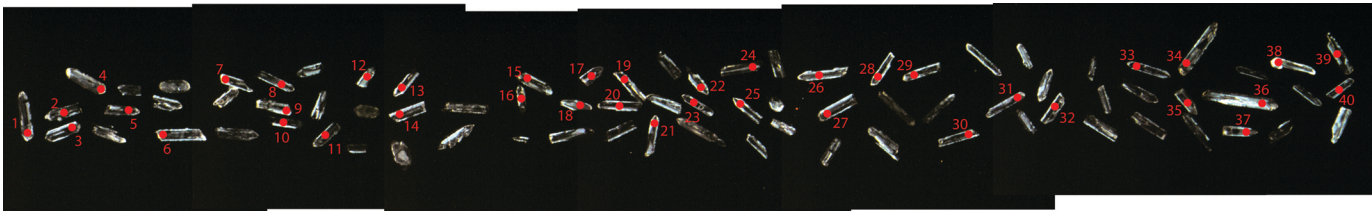

BM100306-6

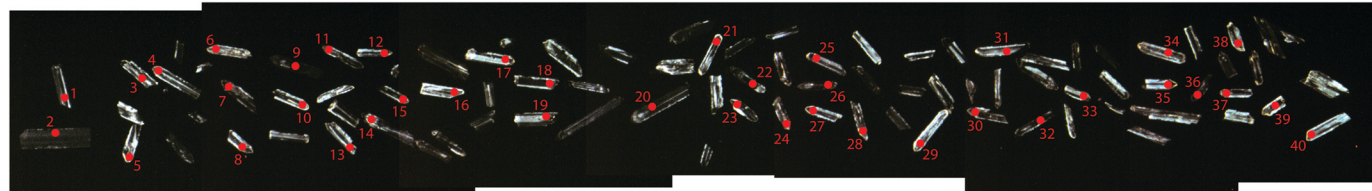

BM100305-2

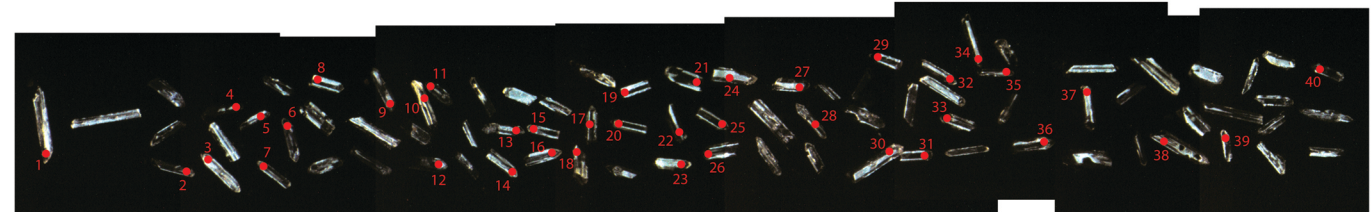

BM100305-1

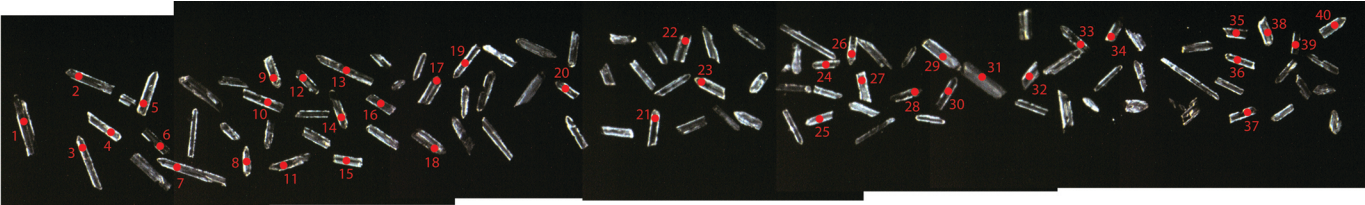

BM100304-2

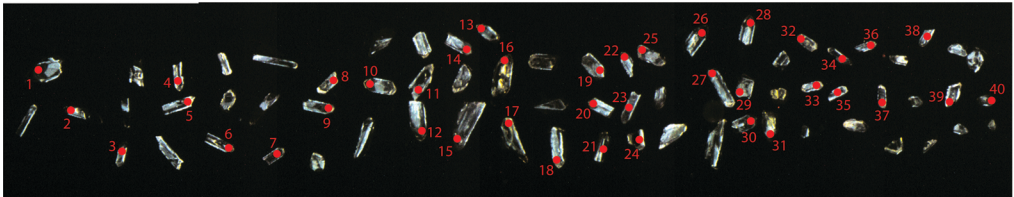

BM100304-4

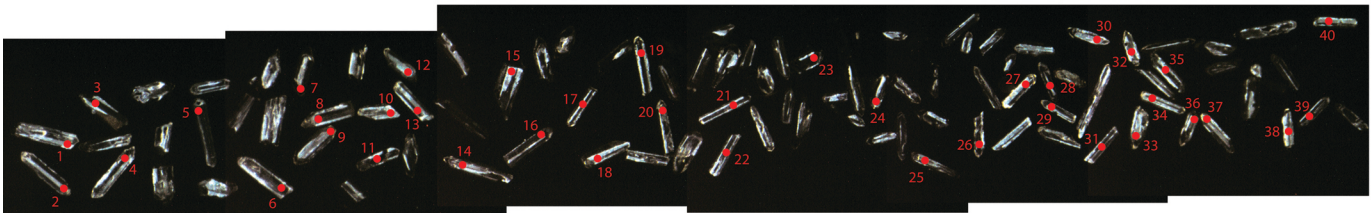

BM100304-5

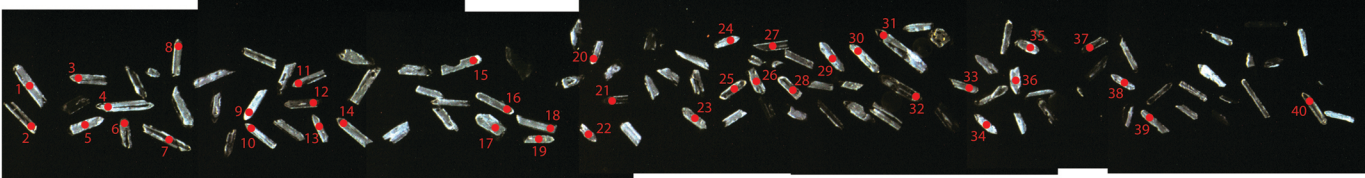

BM100304-1

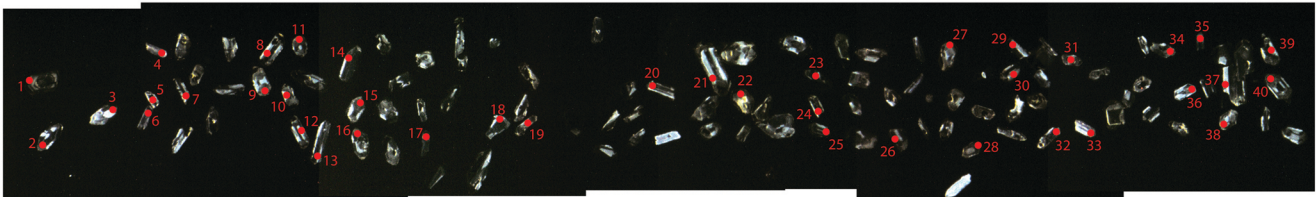

BM100304-3

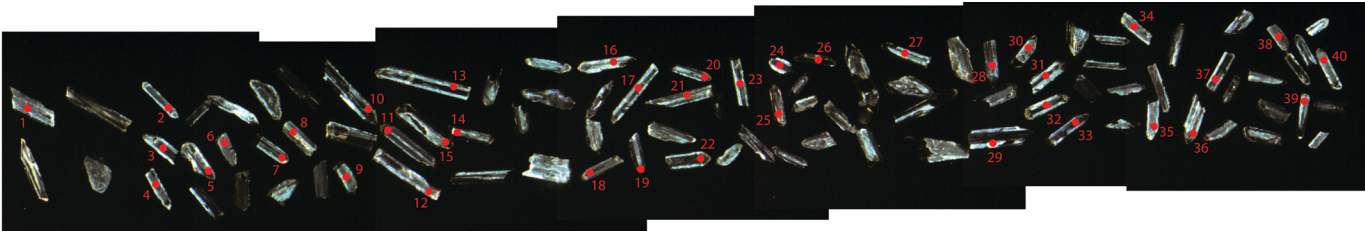

BM100305-3

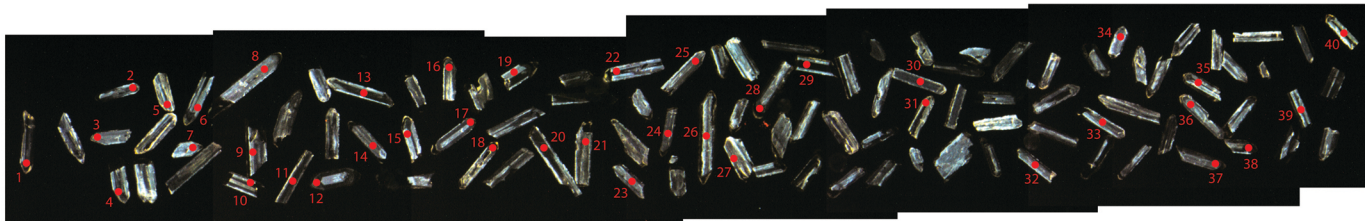

BM100307-1
